# Supplementary material for: pH-responsive luminescence of a new trinuclear Ru(ii) polypyridine complex
Source: Royal Society of Chemistry journal article supplement (doi:10.1039/c4ra07077a), 2014-01-01
Supplement: c4ra07077a1.pdf [file c4ra07077a1.pdf]

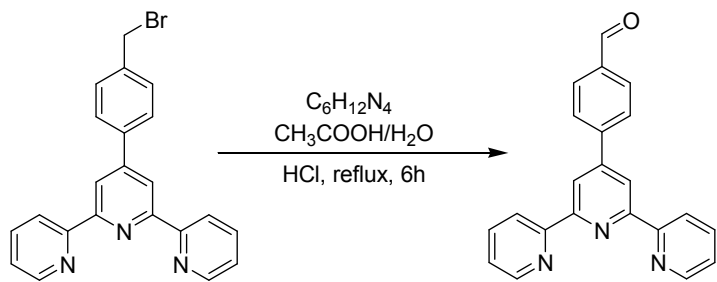

**Scheme S1.** Synthesis of 4'-(*p*-formylphenyl)-2,2':6',2''-terpyridine.

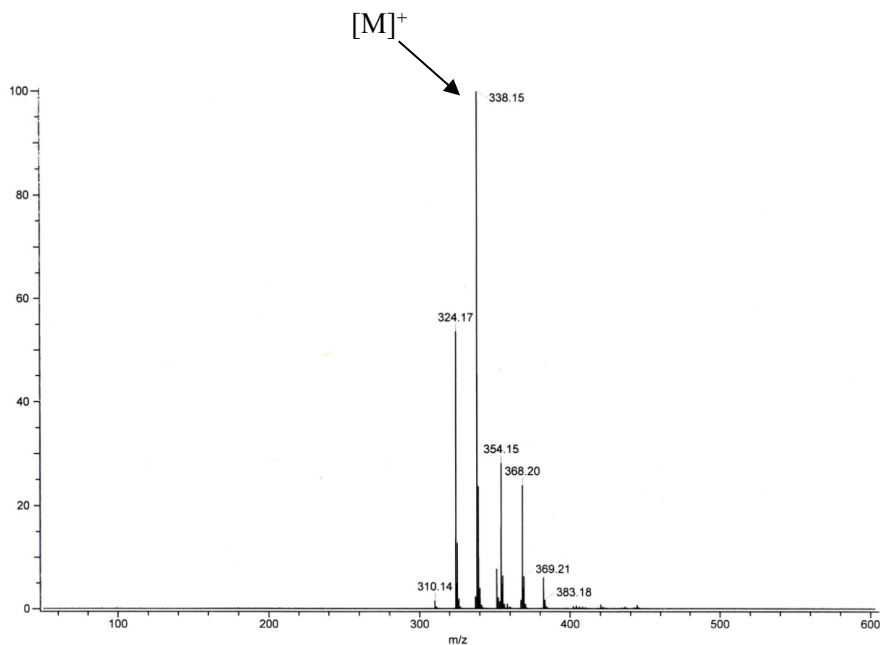

**Figure S1.** ESI Mass spectrum 4'-(*p*-formylphenyl)-2,2':6',2''-terpyridine.

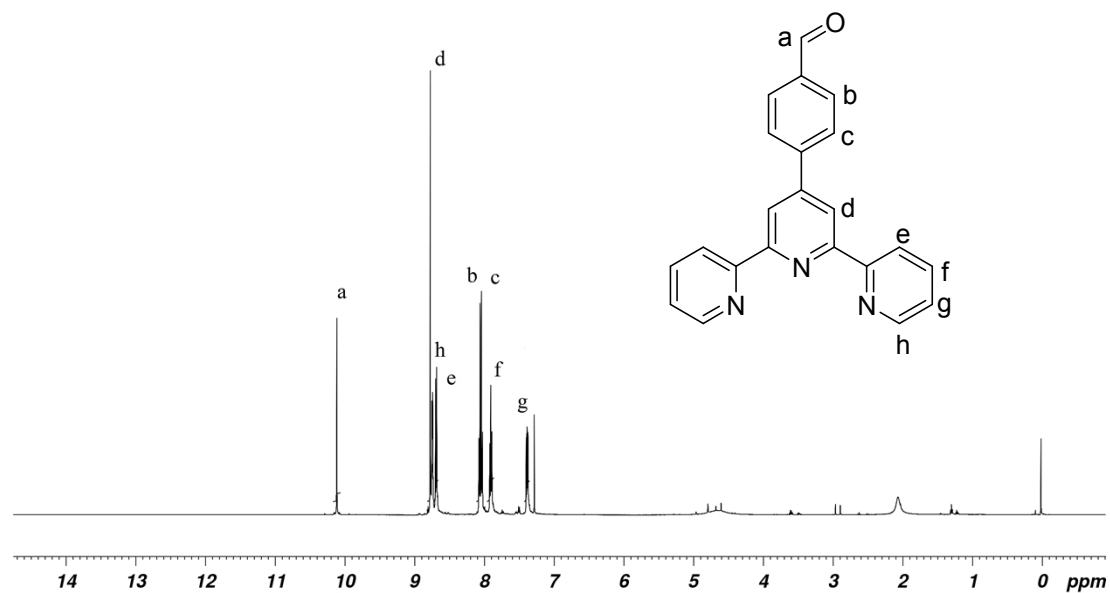

**Figure S2.**  $^1H$  NMR spectrum of 4'-(*p*-formylphenyl)-2,2':6',2''-terpyridine in  $CDCl_3$ .

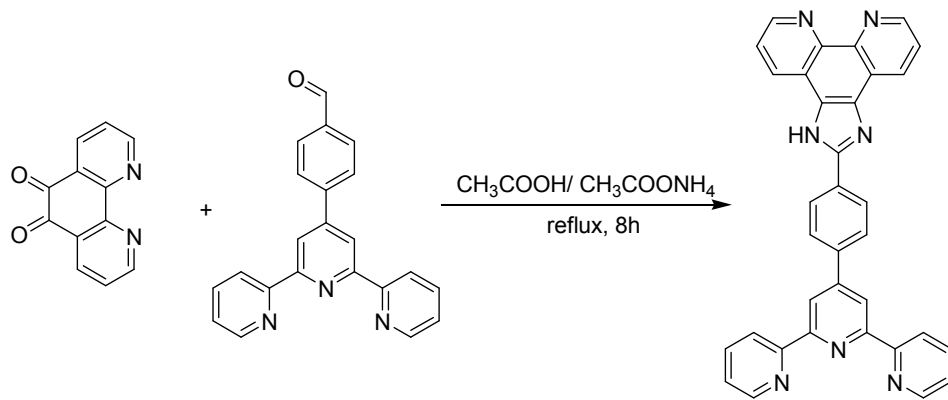

**Scheme S2.** Synthesis of 2-(4-(2,6-di(pyridin-2-yl)pyridin-4-yl)phenyl)-1*H*-imidazo[4,5-*f*][1,10]phenanthroline (ttpy-Izphen).

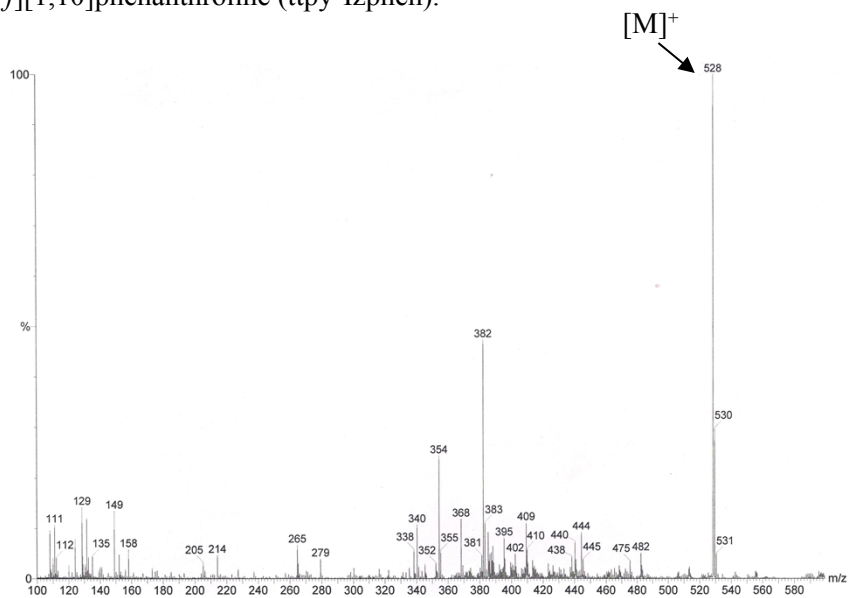

**Figure S3.** ESI Mass spectrum of ttpy-Izphen.

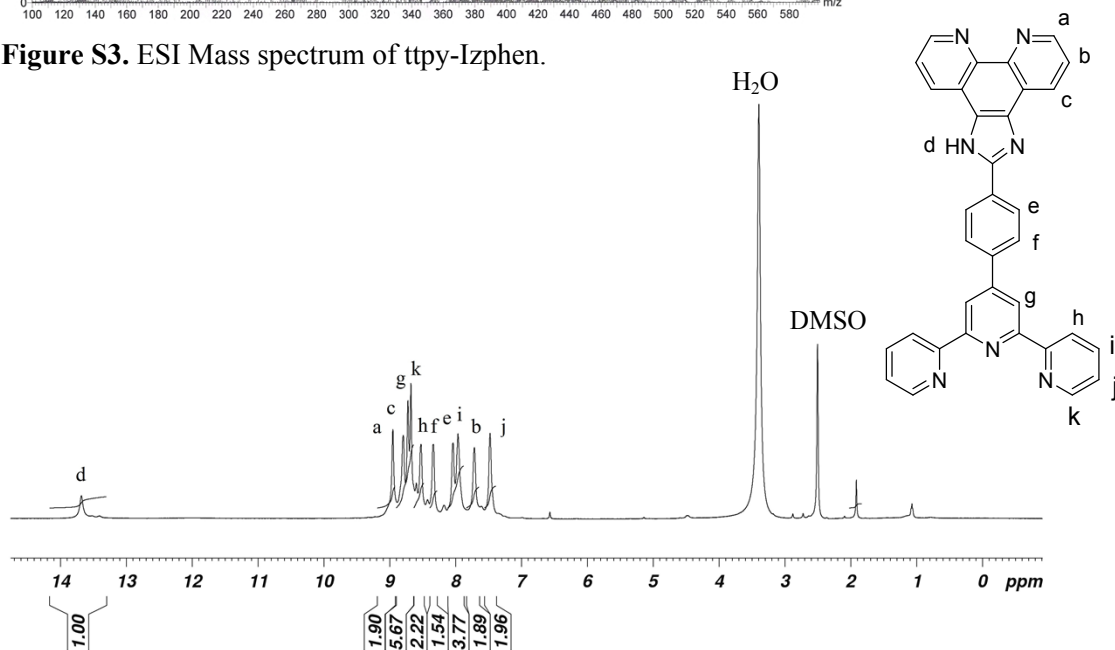

**Figure S4.** <sup>1</sup>H NMR spectrum of ttpy-Izphen in DMSO-*d*<sub>6</sub>.

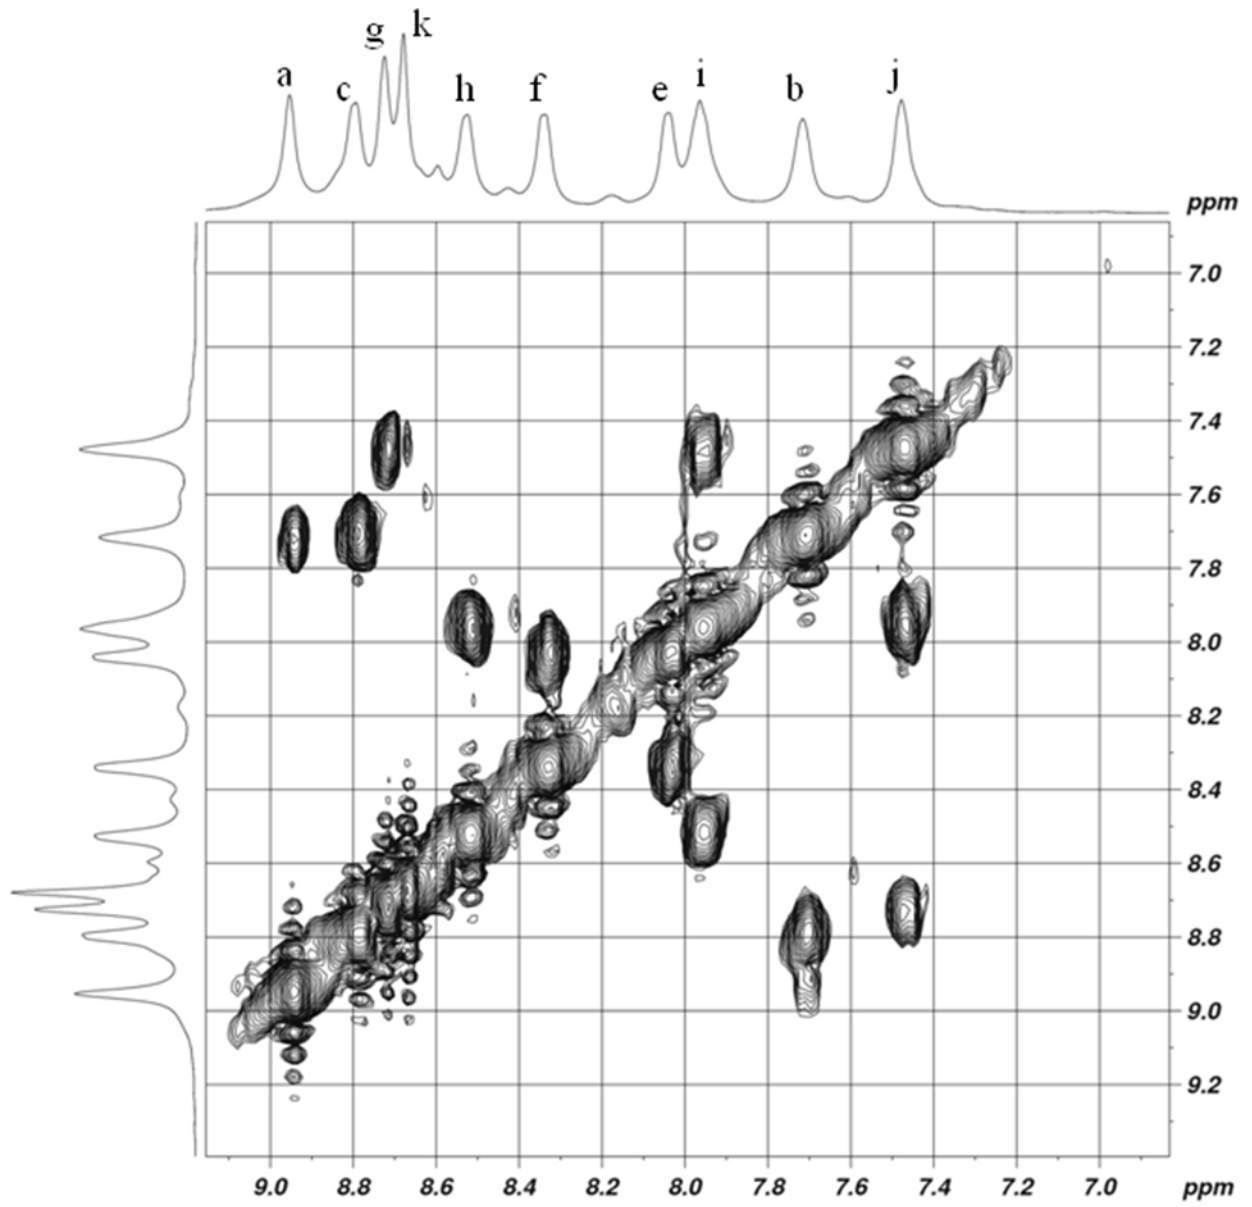

Figure S5.  $^1\text{H}$ - $^1\text{H}$  COSY spectrum of ttpy-Izphen.

**[(tppy-Izphen)Ru(bpy)<sub>2</sub>](ClO<sub>4</sub>)<sub>2</sub> (1).** A solution of the tppy-Izphen (0.92 g, 1.76 mmol) and [Ru(bpy)<sub>2</sub>Cl<sub>2</sub>] (0.84 g, 1.76 mmol) in ethylene glycol (50 mL) was refluxed with stirring for 6 h. The dark red solution was cooled to room temperature, water (500 mL) was added, and filtered. An aqueous solution of sodium perchlorate was added to the filtrate with stirring whereupon a black solid separated out. The compound was filtered, washed with water, dried in vacuo and recrystallised in hot acetonitrile. Black crystalline solid (0.90 g, 44%). IR (KBr,  $\nu_{\max}/\text{cm}^{-1}$ ): 3391  $\nu_s(\text{N-H})$ , 3067  $\nu_s(\text{C-H})$  (aromatic), 1601  $\nu_s(\text{C=N})$ , 1443  $\nu_s(\text{C-H})$  (pyridine), 1087  $\nu(\text{ClO}_4)$ , 794 ( $\beta$ -ring) (pyridine). <sup>1</sup>H NMR (500 MHz, DMSO-*d*<sub>6</sub>, 298 K):  $\delta$  8.88 (dd, 4H, *J* = 8.5, 8.5, *H*<sub>4</sub>, *H*<sub>4'</sub>), 8.76 (d, 2H, *H*<sub>c</sub>), 8.70 (d, 2H, *H*<sub>g</sub>), 8.51 (d, 2H, *J* = 7.5, *H*<sub>h</sub>), 8.38 (d, *J* = 7, 2H, *H*<sub>f</sub>), 8.23 (t, *J* = 8, 7, 4H, *H*<sub>3</sub>), 8.14 (t, *J* = 7.5, 8, 2H, *H*<sub>3'</sub>), 8.10 (d, 2H, *H*<sub>a</sub>), 8.07 (d, 2H, *H*<sub>e</sub>), 7.88 (m, 6H, *H*<sub>i</sub>, *H*<sub>k</sub>, *H*<sub>l</sub>), 7.62 (t, 4H, *H*<sub>1</sub>, *H*<sub>2</sub>), 7.46 (m, 6H, *H*<sub>b</sub>, *H*<sub>j</sub>, *H*<sub>2'</sub>). ESI MS: *m/z* 470 [M-2ClO<sub>4</sub>]<sup>2+</sup> (C<sub>54</sub>H<sub>37</sub>N<sub>11</sub>Ru)<sup>2+</sup>.

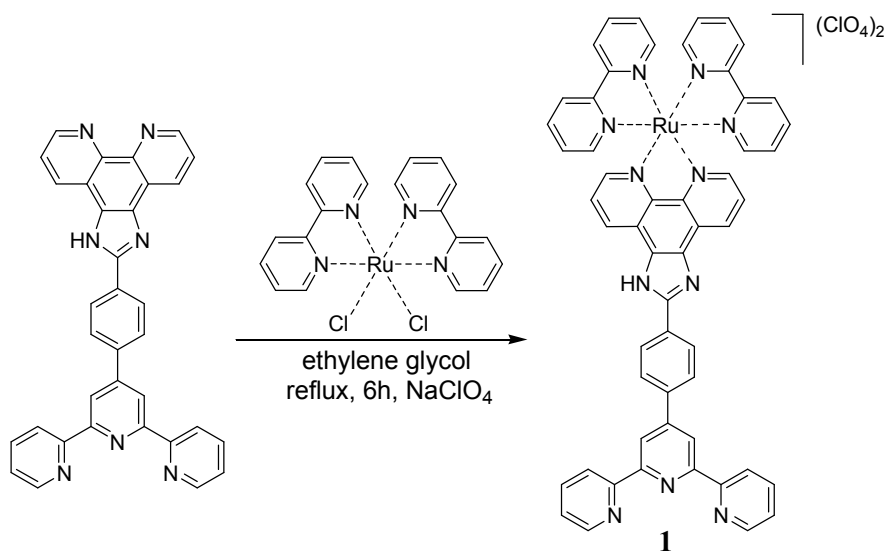

**Scheme S3.** Synthesis of [(tppy-Izphen)Ru(bpy)<sub>2</sub>](ClO<sub>4</sub>)<sub>2</sub> (1).

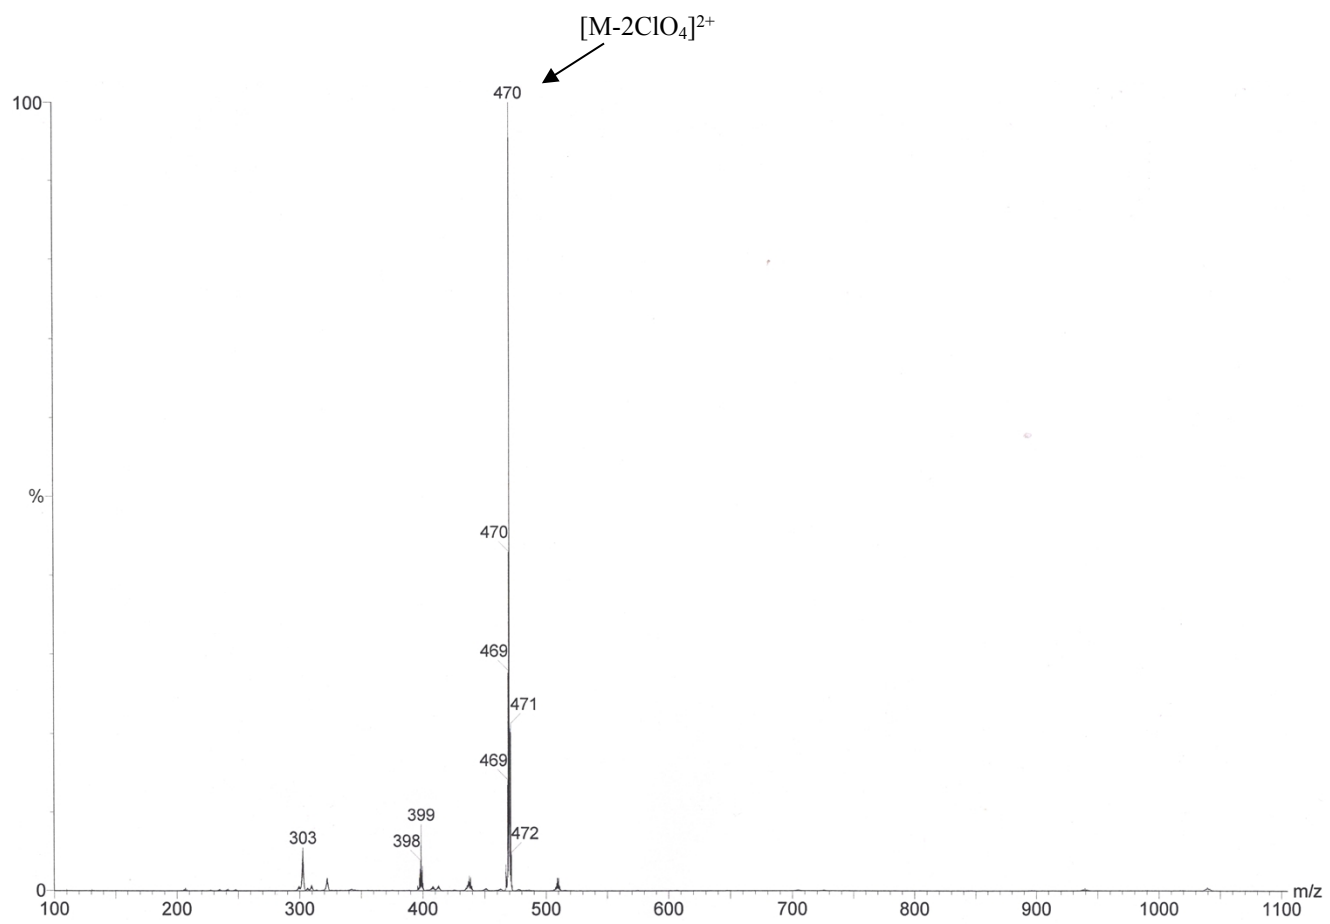

**Figure S6.** ESI Mass spectrum of **1**.

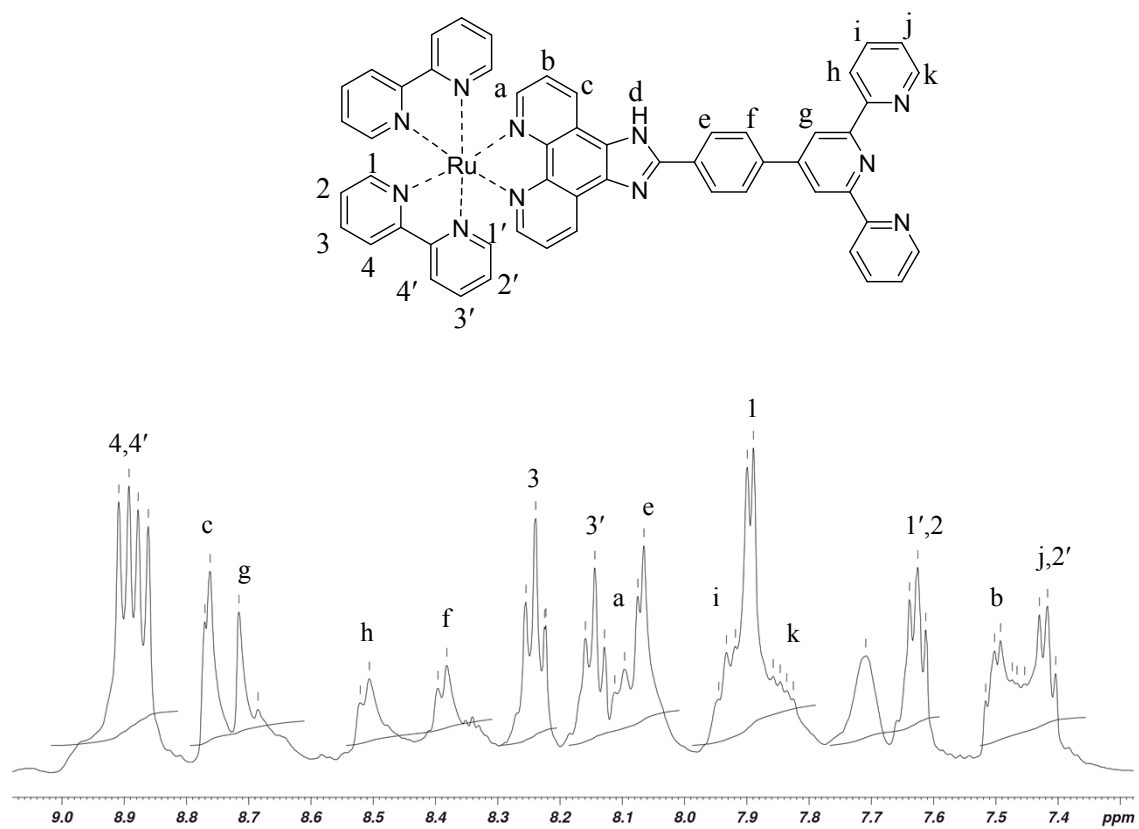

**Figure S7.**  $^1\text{H}$  NMR spectrum of **1** in  $\text{DMSO-}d_6$ .

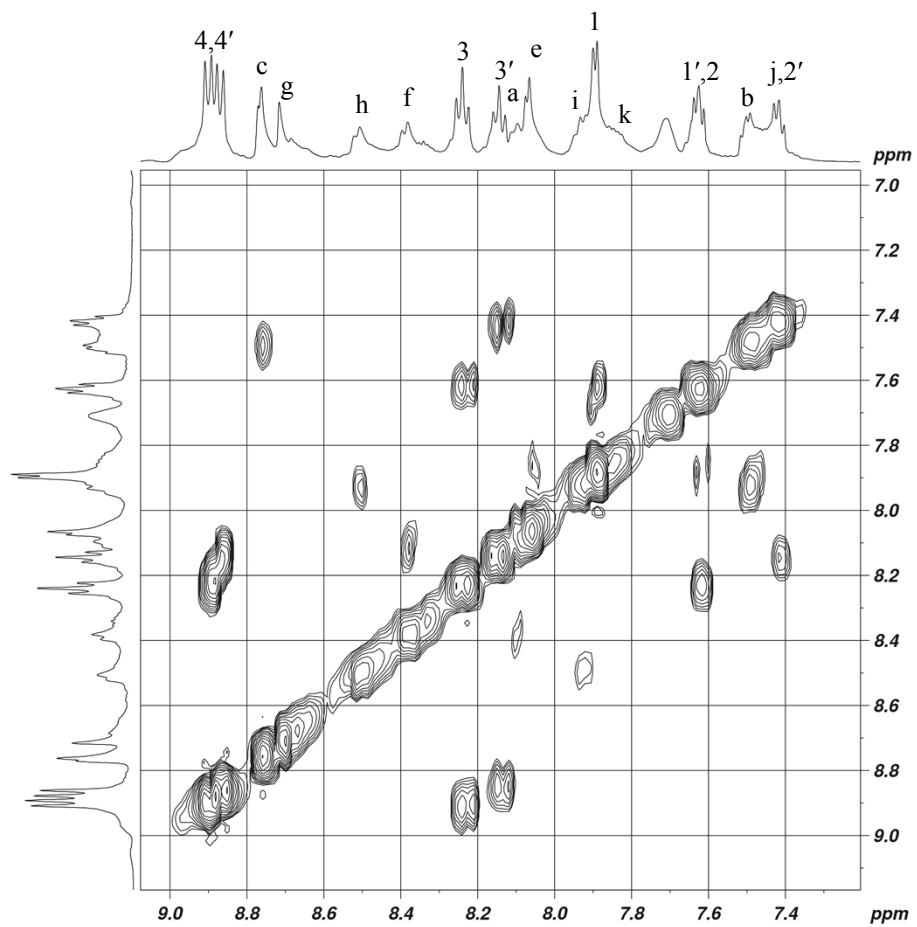

**Figure S8.**  $^1\text{H}$ - $^1\text{H}$  COSY spectrum of **1**.

**[Ru((ttpy-Izphen)Ru(bpy)<sub>2</sub>)](ClO<sub>4</sub>)<sub>6</sub> (3).** A solution of **1** (0.20 g, 0.16 mmol) and RuCl<sub>3</sub>·H<sub>2</sub>O (0.04 g, 0.18 mmol) in methanol (100 mL) was refluxed for 6 h. The reaction mixture was cooled to room temperature, and the red solid that separated out was filtered, washed with water and dried in vacuo to give **2** as a red powder (0.14 g, 58%). A solution of **2** (0.14 g, 0.10 mmol) and **1** (0.12 g, 0.10 mmol) in methanol (100 mL) was refluxed and stirred in the presence of few drops of *N*-methyl morpholine under argon atmosphere for 3 h. The dark red solution was cooled to room temperature and filtered. An aqueous solution of sodium perchlorate was added to the filtrate with stirring whereupon a black solid separated out. The compound was filtered, washed with water, dried in vacuo and recrystallised in hot CH<sub>3</sub>CN. Black crystalline solid (0.24 g, 84%). IR (KBr,  $\nu_{\max}/\text{cm}^{-1}$ ): 3403  $\nu_s(\text{N-H})$ , 3067, 2926  $\nu_s(\text{C-H})$  (aromatic), 1606  $\nu(\text{C=N})$ , 1408  $\nu_s(\text{C-H})$  (pyridine), 1087  $\nu(\text{ClO}_4)$ , 763 ( $\beta$ -ring) (pyridine), 627 (C-C) (ring). <sup>1</sup>H NMR (500 MHz, DMSO-*d*<sub>6</sub>, 298 K):  $\delta$  9.63 (s, 2H, *H<sub>g</sub>*), 9.19 (d, 2H, *H<sub>h</sub>*), 8.92-8.75 (br, 8H, *H<sub>c</sub>*, *H<sub>f</sub>*, *H<sub>4</sub>*, *H<sub>4'</sub>*), 8.25 (t, 2H, *H<sub>3</sub>*), 8.14-8.08 (br, 6H, *H<sub>i</sub>*, *H<sub>k</sub>*, *H<sub>3'</sub>*), 7.97 (br, 2H, *H<sub>a</sub>*, *H<sub>e</sub>*), 7.88 (nr, 2H, *H<sub>l</sub>*), 7.67-7.62 (br, 6H, *H<sub>b</sub>*, *H<sub>1'</sub>*, *H<sub>2</sub>*), 7.40 (t, 2H, *H<sub>j</sub>*), 7.34 (t, 2H, *H<sub>2'</sub>*). ESI MS:  $m/z$  694 [M-5ClO<sub>4</sub>]<sup>3+</sup> (C<sub>108</sub>H<sub>74</sub>N<sub>22</sub>ClO<sub>4</sub>Ru<sub>3</sub>)<sup>3+</sup>, 495 [M-6ClO<sub>4</sub>]<sup>4+</sup> (C<sub>108</sub>H<sub>74</sub>N<sub>22</sub>Ru<sub>3</sub>)<sup>4+</sup>, 397 [M-6ClO<sub>4</sub>]<sup>5+</sup> (C<sub>108</sub>H<sub>74</sub>N<sub>22</sub>Ru<sub>3</sub>)<sup>5+</sup>, 331 [M-6ClO<sub>4</sub>]<sup>6+</sup> (C<sub>108</sub>H<sub>74</sub>N<sub>22</sub>Ru<sub>3</sub>)<sup>6+</sup>.

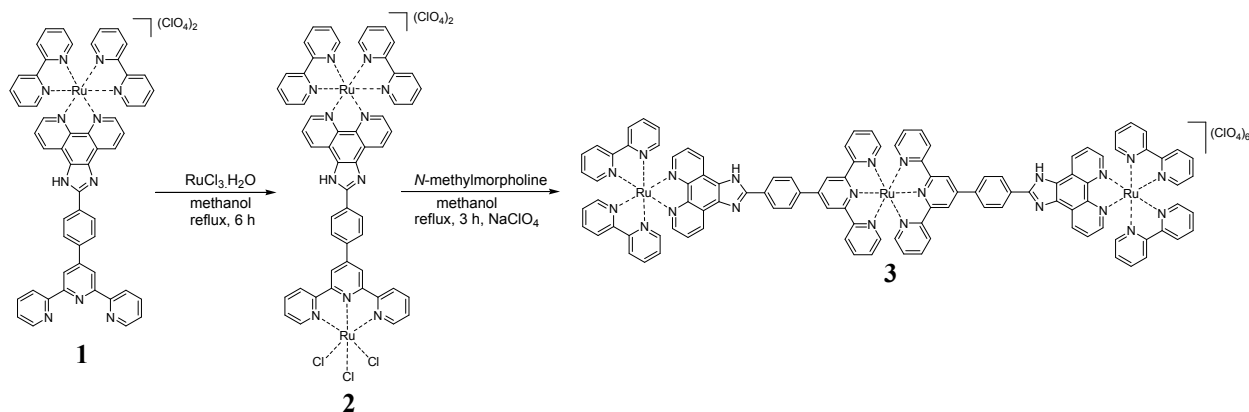

**Scheme S4.** Synthesis of [Ru((ttpy-Izphen)Ru(bpy)<sub>2</sub>)](ClO<sub>4</sub>)<sub>6</sub> (**3**).



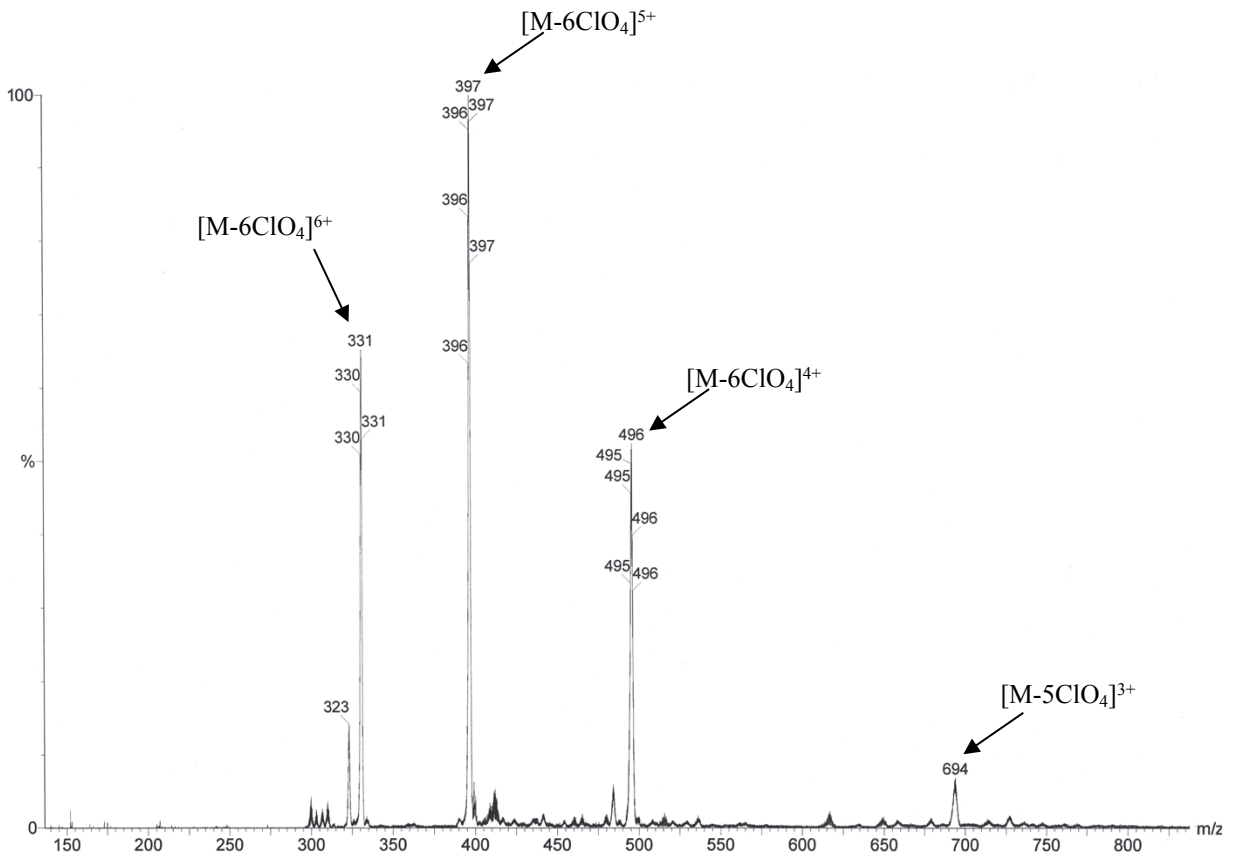

**Figure S9.** ESI Mass spectrum of **3**.

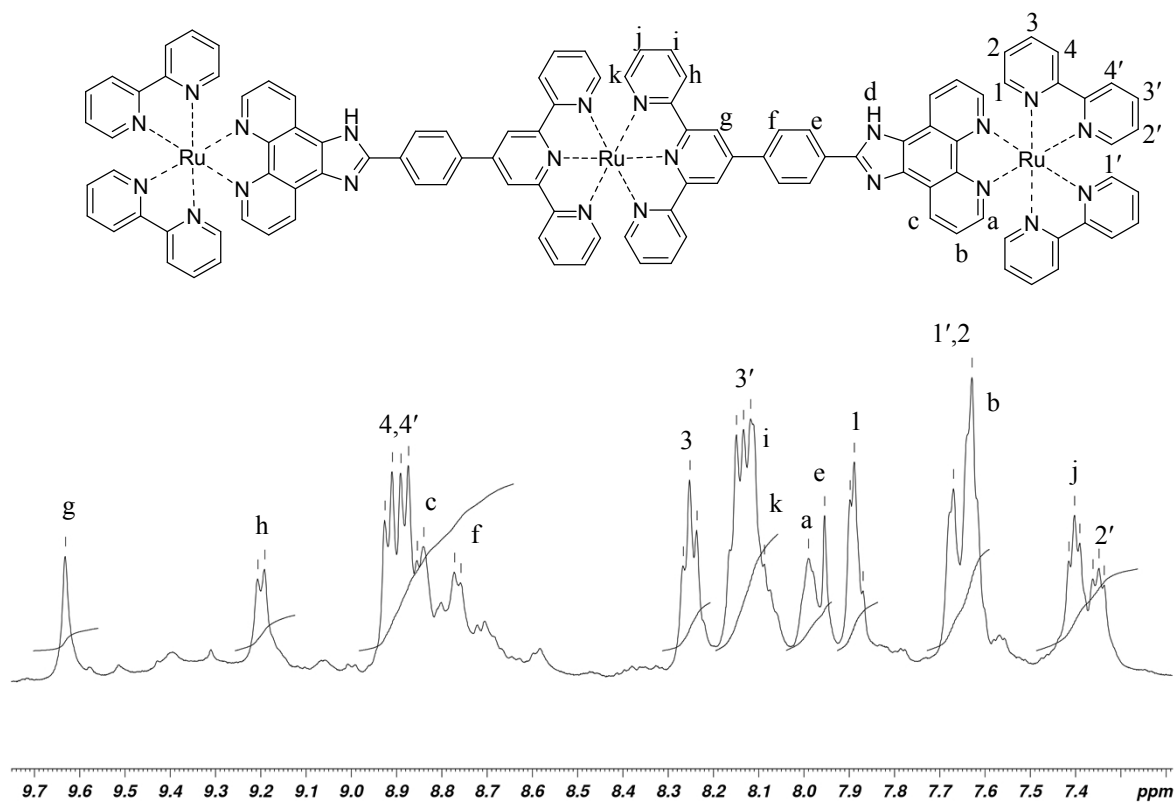

**Figure S10.** <sup>1</sup>H NMR spectrum of **3** in DMSO-*d*<sub>6</sub>.

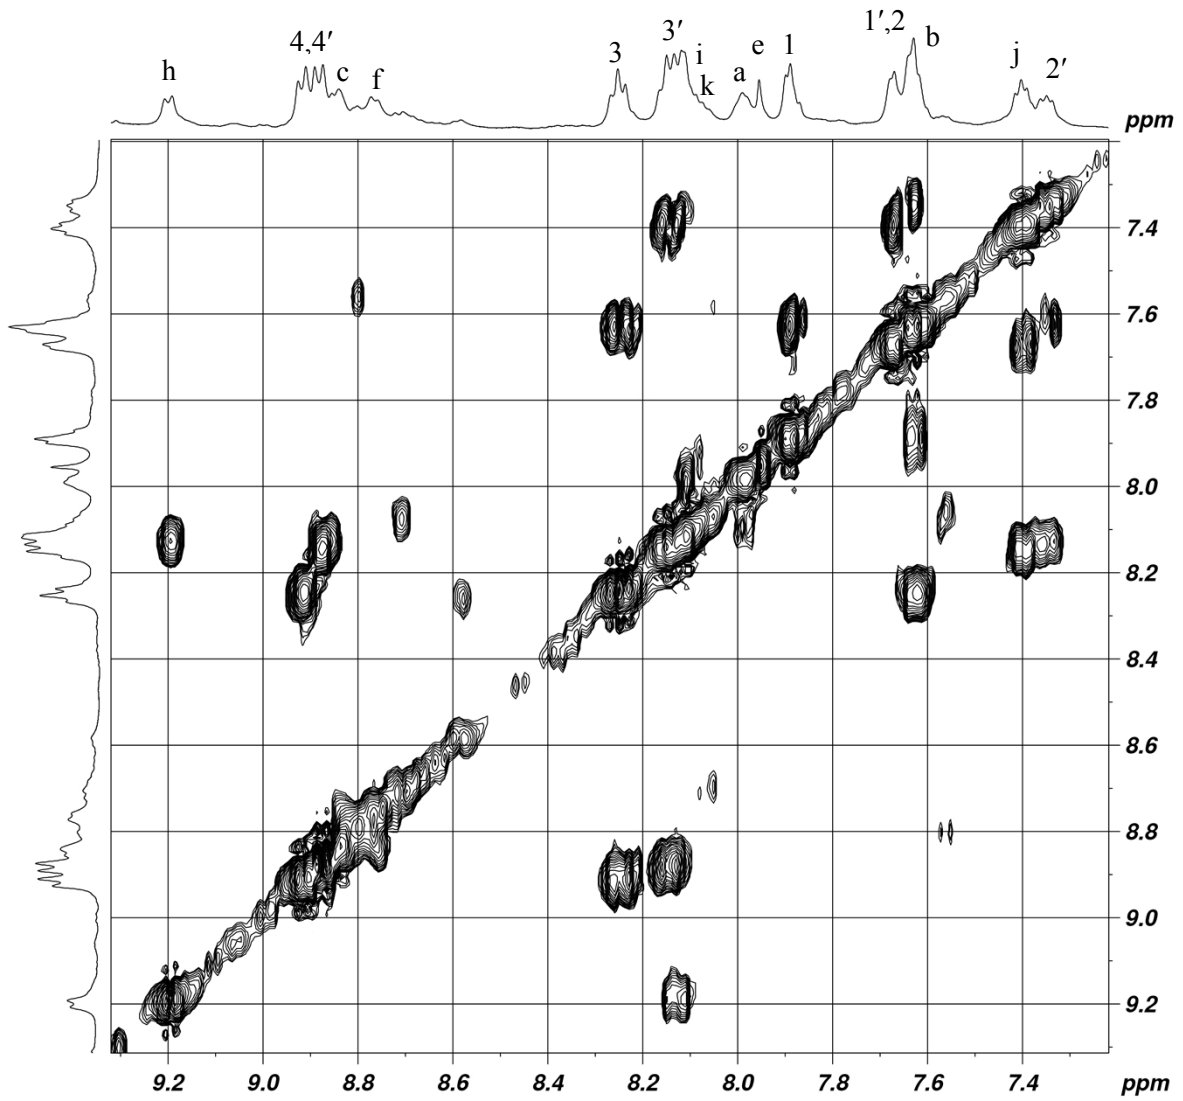

Figure S11.  $^1\text{H}$ - $^1\text{H}$  COSY spectrum of **3**.

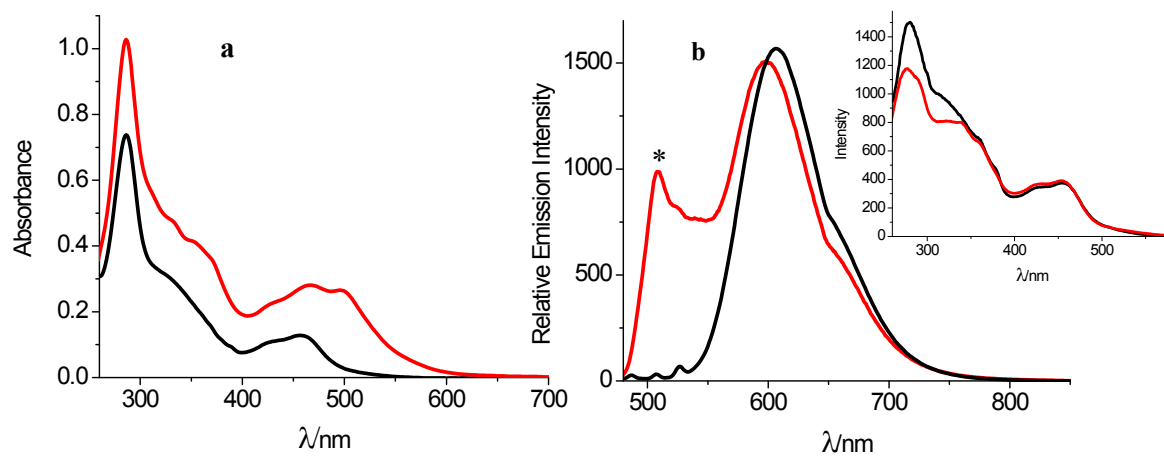

**Figure S12.** (a) The absorption spectrum of **1** (black) and **3** (red). (b) Emission spectrum of **1** and **3** in CH<sub>3</sub>CN at 298 K (\* denotes the Raman peak of CH<sub>3</sub>CN); inset: excitation spectrum.

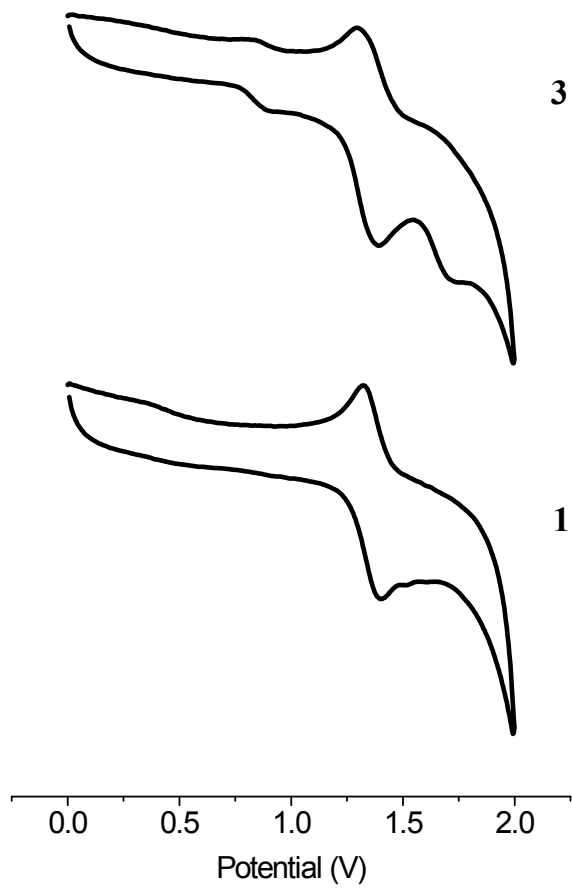

**Figure S13.** Cyclic voltammogram of **1** (bottom) and **3** (top) on a glassy carbon millielectrode in CH<sub>3</sub>CN (Et<sub>4</sub>NClO<sub>4</sub>) versus Ag/Ag<sup>+</sup> at 25 °C.

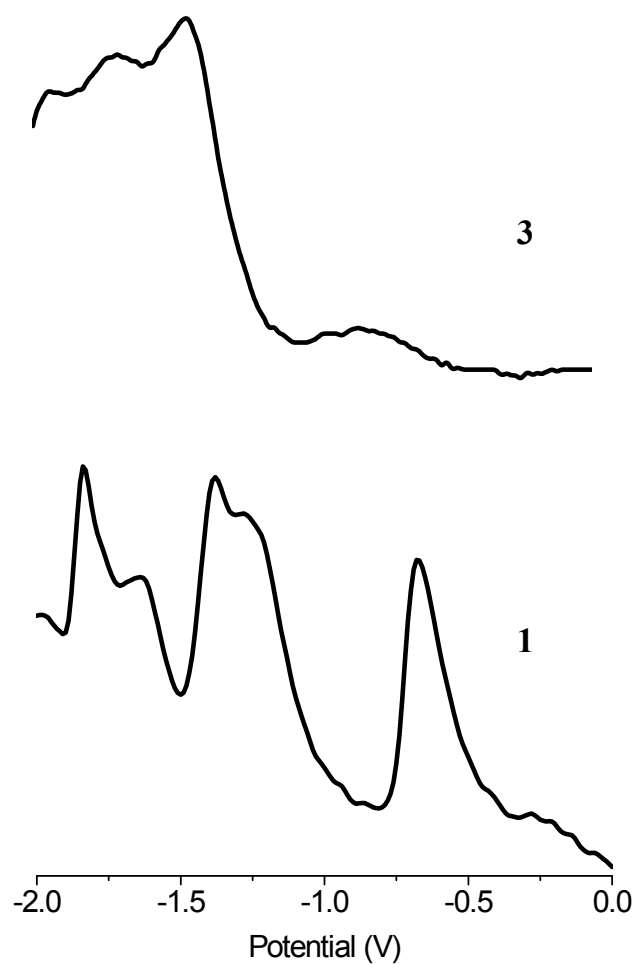

**Figure S14.** Square wave voltammogram of **1** and **3** on a glassy carbon millielectrode in CH<sub>3</sub>CN (Et<sub>4</sub>NClO<sub>4</sub>) versus Ag/Ag<sup>+</sup> at 25 °C.

**Table S1.** Electrochemical Data<sup>a</sup>

| Compound | $E_{1/2}$ (V) |                                   |
|----------|---------------|-----------------------------------|
|          | oxidation     | reduction <sup>b</sup>            |
| <b>1</b> | 1.36          | -0.68, -1.28, -1.38, -1.64, -1.84 |
| <b>3</b> | 0.86, 1.34    | -0.82, -1.45, -1.70, -1.92        |

<sup>a</sup>The data are computed from cyclic voltammogram recorded on a glassy carbon millielectrode in acetonitrile (10<sup>-3</sup> M) using tetraethylammonium perchlorate as the supporting electrolyte (0.1 M) at 298 K at the scan rate of 100 mV s<sup>-1</sup>. Potentials are reported in volts versus Ag/Ag<sup>+</sup>. <sup>b</sup> $E_{1/2}$  values obtained from square wave voltammetry.

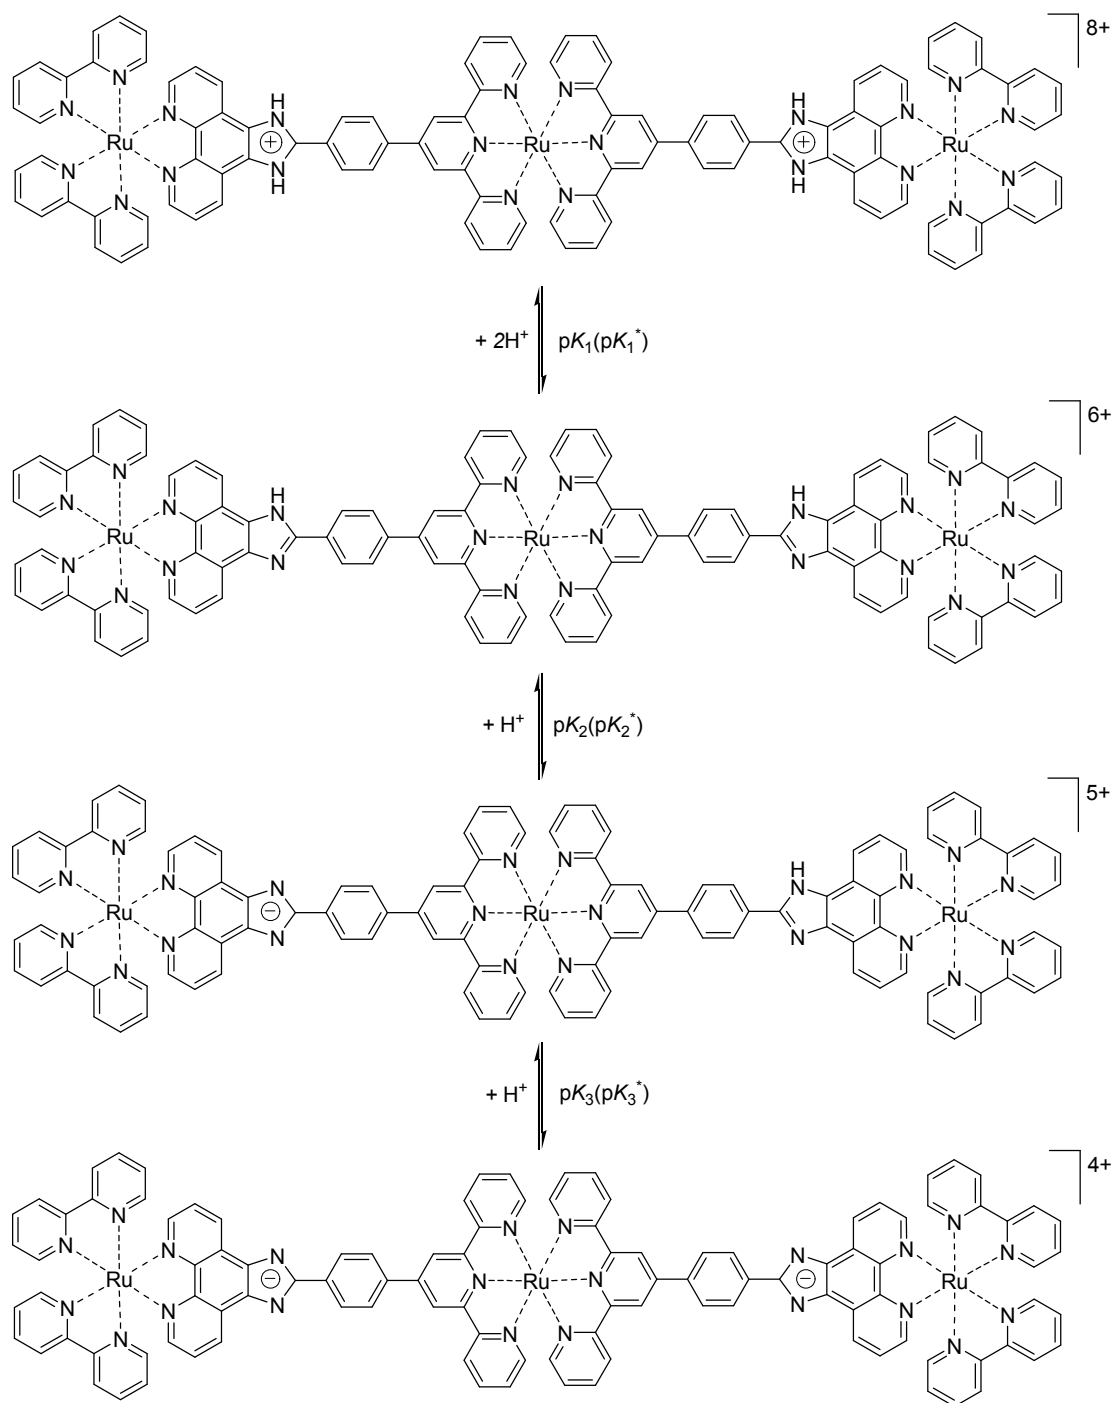

**Scheme S5.** Successive deprotonation steps of **3**.

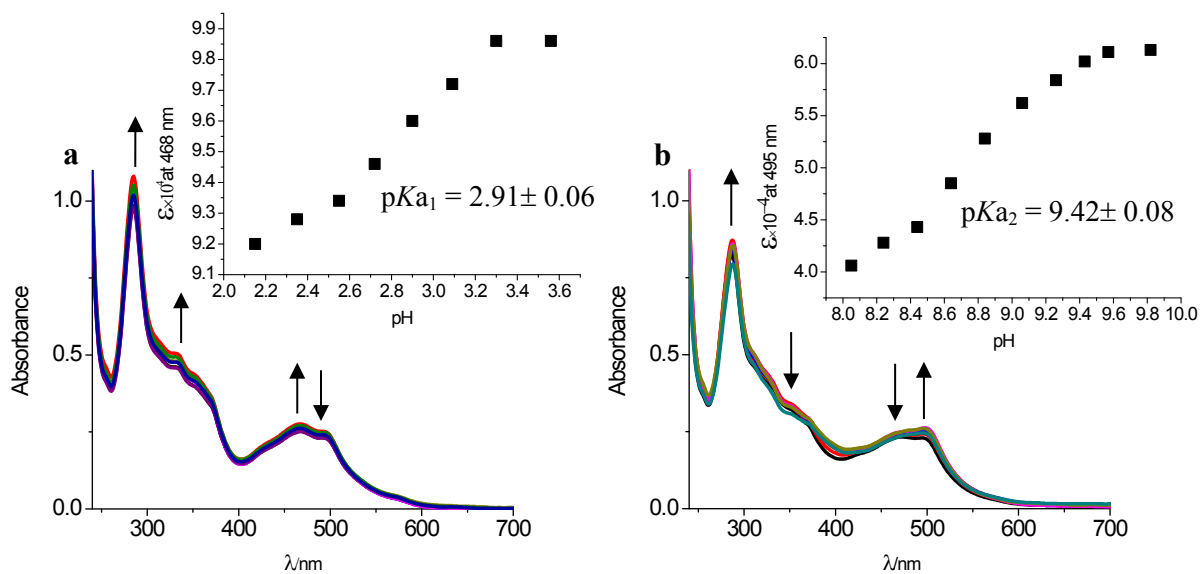

**Figure S15.** The absorption spectra of **3** (5 μM) in acetonitrile/Britton-Robinson buffer solution (3:2, v/v) as a function of pH: (a) pH 2.15-3.59, (b) pH 8.06-9.74. Insets: molar absorptivity ( $\epsilon$ ) at 428 and 495 nm as a function of pH.

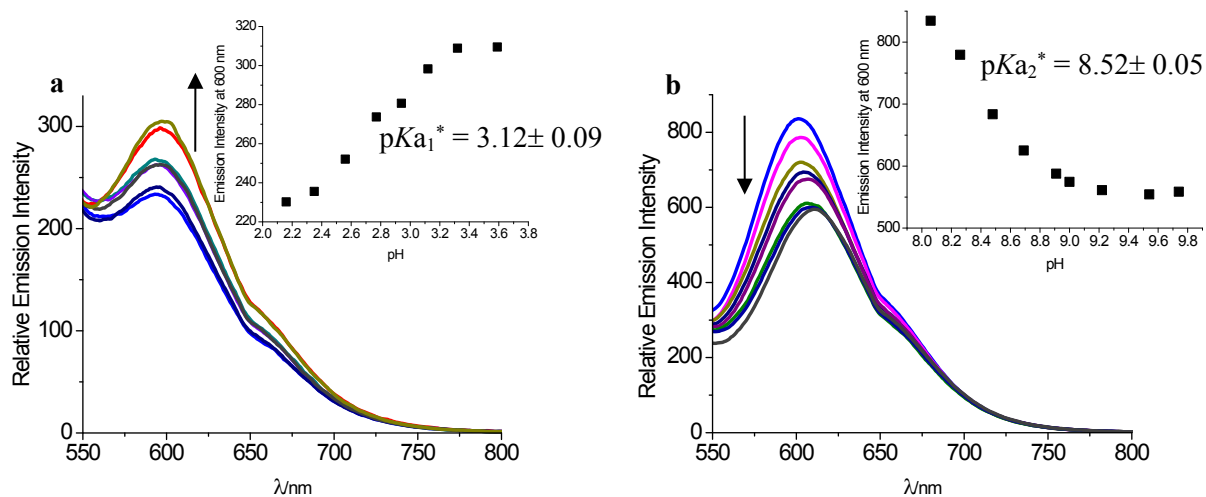

**Figure S16.** The emission spectra of **3** (5.0 μM) in acetonitrile/Britton-Robinson buffer (3:2, v/v) as a function of pH: (a) pH 2.15-3.59, (b) pH 8.06-9.74. Insets: relative emission intensity at 600 nm ( $\lambda_{\text{ex}} = 455$  nm) as a function of pH.
